# Supplementary material for: Complicated Pocket Infection in Patients Undergoing Lead Extraction: Characteristics and Outcomes
Source: MDPI journal article supplement (doi:10.3390/jcm12134397), 2023-06-29
Supplement: s1 [file s1]

## Supplemental Materials

**Supplemental Table S1. The different mortality rates between groups at different time points.**

|                             | Overall    | Isolated  | Complicated | Systemic  | P value |
|-----------------------------|------------|-----------|-------------|-----------|---------|
| <b>Number of patients</b>   | 300        | 104       | 42          | 154       |         |
| <b>Mortality at 30 days</b> | 33 (11.0)  | 3 (2.9)   | 4 (9.5)     | 26 (16.9) | 0.002   |
| <b>Mortality at 90 days</b> | 50 (16.7)  | 7 (6.7)   | 4 (9.5)     | 39 (25.3) | <0.001  |
| <b>Mortality at 1 year</b>  |            |           |             |           | 0.001   |
| <b>No</b>                   | 213 (71.0) | 82 (78.8) | 34 (81.0)   | 97 (63.0) |         |
| <b>Yes</b>                  | 71 (23.7)  | 13 (12.5) | 6 (14.3)    | 52 (33.8) |         |
| <b>Unspecified</b>          | 16 (5.3)   | 9 (8.7)   | 2 (4.8)     | 5 (3.2)   |         |
| <b>Mortality at 3 years</b> |            |           |             |           | <0.001  |
| <b>No</b>                   | 135 (45.0) | 47 (45.2) | 25 (59.5)   | 63 (40.9) |         |
| <b>Yes</b>                  | 95 (31.7)  | 20 (19.2) | 9 (21.4)    | 66 (42.9) |         |
| <b>Unspecified</b>          | 70 (23.3)  | 37 (35.6) | 8 (19.0)    | 25 (16.2) |         |
| <b>Mortality at 5 years</b> |            |           |             |           | 0.001   |
| <b>No</b>                   | 57 (19.0)  | 22 (21.2) | 10 (23.8)   | 25 (16.2) |         |
| <b>Yes</b>                  | 122 (40.7) | 27 (26.0) | 15 (35.7)   | 80 (51.9) |         |
| <b>Unspecified</b>          | 121 (40.3) | 55 (52.9) | 17 (40.5)   | 49 (31.8) |         |

**Supplemental Table S2. Univariate analysis of 30days mortality.**

| Mortality at 30 days                | All         | Alive       | Dead        | p_value | Odds ratio | Lower CI 95% | Upper CI 95% |
|-------------------------------------|-------------|-------------|-------------|---------|------------|--------------|--------------|
| Number of patients                  | 300         | 267         | 33          |         |            |              |              |
| Female                              | 67 (22)     | 58 (22)     | 9 (27)      | 0.479   | 1.35       | 0.6          | 3.07         |
| Age                                 | 67 (15)     | 66 (16)     | 70 (11)     | 0.216   | 1.02       | 0.99         | 1.04         |
| Smoking                             | 78 (26)     | 67 (25)     | 11 (33)     | 0.32    | 1.49       | 0.69         | 3.24         |
| Atrial fibrillation                 | 110 (37)    | 93 (35)     | 17 (52)     | 0.065   | 1.99       | 0.96         | 4.12         |
| Hypertension                        | 180 (60)    | 158 (59)    | 22 (67)     | 0.403   | 1.38       | 0.64         | 2.96         |
| Heart failure                       | 135 (45)    | 117 (44)    | 18 (55)     | 0.244   | 1.54       | 0.74         | 3.18         |
| Stroke                              | 42 (14)     | 36 (13)     | 6 (18)      | 0.478   | 1.43       | 0.55         | 3.69         |
| Vascular disease                    | 168 (56)    | 147 (55)    | 21 (64)     | 0.345   | 1.43       | 0.68         | 3.02         |
| Malignancy                          | 21 (7)      | 19 (7)      | 2 (6)       | 0.819   | 0.84       | 0.19         | 3.79         |
| Prosthetic valve                    | 29 (10)     | 25 (9)      | 4 (12)      | 0.624   | 1.34       | 0.43         | 4.11         |
| Diabetes mellitus                   | 131 (44)    | 111 (42)    | 20 (61)     | 0.038   | 2.16       | 1.03         | 4.53         |
| ICD implant (not pacemaker)         | 112 (37)    | 102 (38)    | 10 (30)     | 0.37    | 0.7        | 0.32         | 1.54         |
| History of device related infection | 44 (15)     | 42 (16)     | 2 (6)       | 0.103   | 0.35       | 0.08         | 1.5          |
| Number of leads extracted           | 2.2 (0.9)   | 2.2 (0.9)   | 2.3 (1)     | 0.57    | 1.12       | 0.75         | 1.68         |
| First device to extraction (days)   | 2692 (2187) | 2722 (2224) | 2448 (1877) | 0.487   | 0.9999     | 0.9998       | 1.0001       |
| Extraction type                     | 209 (70)    | 187 (71)    | 22 (67)     | 0.625   | 0.82       | 0.38         | 1.78         |
| Creatinine (mg/dl)                  | 1.4 (1)     | 1.3 (0.9)   | 2.2 (1.4)   | < 0.001 | 1.93       | 1.42         | 2.63         |
| Albumin (g/dl)                      | 3.2 (0.7)   | 3.3 (0.7)   | 2.6 (0.5)   | < 0.001 | 0.23       | 0.12         | 0.43         |
| Hemoglobin (g/dl)                   | 11.1 (1.9)  | 11.2 (1.8)  | 10 (1.7)    | < 0.001 | 0.66       | 0.52         | 0.84         |
| Lekuocytosis > 10K                  | 113 (38)    | 94 (35)     | 19 (58)     | 0.014   | 2.5        | 1.2          | 5.21         |
| Temperature > 37.8                  | 134 (46)    | 112 (43)    | 22 (69)     | 0.006   | 2.87       | 1.31         | 6.3          |
| Staph aureus                        | 94 (34)     | 76 (31)     | 18 (60)     | 0.002   | 3.34       | 1.53         | 7.27         |
| Streptococcus                       | 8 (3)       | 7 (3)       | 1 (3)       | 0.857   | 1.22       | 0.15         | 10.28        |
| Enterococcus                        | 25 (9)      | 22 (9)      | 3 (10)      | 0.805   | 1.18       | 0.33         | 4.19         |
| Pseudomonas                         | 28 (10)     | 25 (10)     | 3 (10)      | 0.973   | 1.02       | 0.29         | 3.61         |
| Simple pocket infection             | 104 (35)    | 101 (38)    | 3 (9)       | < 0.001 | 0.16       | 0.05         | 0.55         |
| Complicated pocket infection        | 54 (18)     | 50 (19)     | 4 (12)      | 0.33    | 0.6        | 0.2          | 1.78         |
| Systemic infection                  | 142 (47)    | 116 (43)    | 26 (79)     | < 0.001 | 4.83       | 2.03         | 11.53        |

**Supplemental Table S3. Univariate analysis of 1 year mortality.**

| Mortality at 1 year                 | All         | Alive       | Dead        | p_value | Odds ratio | Lower CI 95% | Upper CI 95% |
|-------------------------------------|-------------|-------------|-------------|---------|------------|--------------|--------------|
| Number of patients                  | 284         | 213         | 71          |         |            |              |              |
| Female                              | 62 (22)     | 44 (21)     | 18 (25)     | 0.412   | 1.3        | 0.7          | 2.45         |
| Age                                 | 66 (15)     | 65 (16)     | 72 (12)     | < 0.001 | 1.04       | 1.02         | 1.06         |
| Smoking                             | 77 (27)     | 58 (27)     | 19 (27)     | 0.939   | 0.98       | 0.53         | 1.79         |
| Atrial fibrillation                 | 100 (35)    | 62 (29)     | 38 (54)     | < 0.001 | 2.8        | 1.61         | 4.87         |
| Hypertension                        | 173 (61)    | 125 (59)    | 48 (68)     | 0.179   | 1.47       | 0.83         | 2.59         |
| Heart failure                       | 127 (45)    | 87 (41)     | 40 (56)     | 0.023   | 1.87       | 1.09         | 3.22         |
| Stroke                              | 40 (14)     | 27 (13)     | 13 (18)     | 0.249   | 1.54       | 0.75         | 3.19         |
| Vascular disease                    | 162 (57)    | 114 (54)    | 48 (68)     | 0.036   | 1.81       | 1.03         | 3.19         |
| Malignancy                          | 20 (7)      | 14 (7)      | 6 (8)       | 0.599   | 1.31       | 0.48         | 3.55         |
| Prosthetic valve                    | 29 (10)     | 19 (9)      | 10 (14)     | 0.228   | 1.67       | 0.74         | 3.79         |
| Diabetes mellitus                   | 124 (44)    | 84 (39)     | 40 (56)     | 0.013   | 1.98       | 1.15         | 3.41         |
| ICD implant (not pacemaker)         | 106 (37)    | 76 (36)     | 30 (42)     | 0.324   | 1.32       | 0.76         | 2.28         |
| History of device related infection | 40 (14)     | 34 (16)     | 6 (8)       | 0.099   | 0.49       | 0.2          | 1.21         |
| Number of leads extracted           | 2.3 (0.9)   | 2.2 (0.9)   | 2.3 (0.9)   | 0.49    | 1.11       | 0.82         | 1.5          |
| First device to extraction (days)   | 2677 (2163) | 2749 (2289) | 2464 (1731) | 0.328   | 0.9999     | 0.9998       | 1.0001       |
| Extraction type                     | 203 (72)    | 155 (74)    | 48 (68)     | 0.318   | 0.74       | 0.41         | 1.33         |
| Creatinine (mg/dl)                  | 1.4 (1)     | 1.2 (0.7)   | 2.1 (1.3)   | < 0.001 | 2.58       | 1.8          | 3.68         |
| Albumin (g/dl)                      | 3.2 (0.7)   | 3.4 (0.6)   | 2.7 (0.6)   | < 0.001 | 0.19       | 0.11         | 0.32         |
| Hemoglobin (g/dl)                   | 11 (1.9)    | 11.3 (1.8)  | 10.2 (1.7)  | < 0.001 | 0.69       | 0.58         | 0.83         |
| Lekuocytosis > 10K                  | 111 (39)    | 75 (35)     | 36 (51)     | 0.022   | 1.89       | 1.1          | 3.26         |
| Temperature > 37.8                  | 131 (48)    | 92 (44)     | 39 (59)     | 0.032   | 1.84       | 1.05         | 3.22         |
| Staph aureus                        | 91 (35)     | 59 (30)     | 32 (50)     | 0.004   | 2.36       | 1.32         | 4.19         |
| Streptococcus                       | 7 (3)       | 4 (2)       | 3 (5)       | 0.274   | 2.4        | 0.52         | 11.03        |
| Enterococcus                        | 24 (9)      | 16 (8)      | 8 (12)      | 0.293   | 1.64       | 0.67         | 4.02         |
| Pseudomonas                         | 26 (10)     | 21 (10)     | 5 (8)       | 0.519   | 0.72       | 0.26         | 2            |
| Simple pocket infection             | 95 (33)     | 82 (38)     | 13 (18)     | 0.001   | 0.36       | 0.18         | 0.69         |
| Complicated pocket infection        | 52 (18)     | 45 (21)     | 7 (10)      | 0.025   | 0.41       | 0.18         | 0.95         |
| Systemic infection                  | 137 (48)    | 86 (40)     | 51 (72)     | < 0.001 | 3.77       | 2.1          | 6.76         |
